# Supplementary material for: Bivariate One Strain Many Compounds Designs Expand the Secondary Metabolite Production Space in Corallococcus coralloides
Source: MDPI journal article supplement (doi:10.3390/microorganisms11102592), 2023-10-20
Supplement: s1 [file s1]

## Supporting Information:

**Table S1.** Result summary of genome analysis of *C. coralloides* DSM2259 genome (NCBI accession # CP003389) with antiSMASH. NP = natural product, bp = base pairs, DB = database

| Cluster ID | NP class               | bp <sub>start</sub> | bp <sub>end</sub> | # bp    | Predicted BGC                                                                            | sequence similarity [%] | DB BGC     | Origin of DB BGC                  |
|------------|------------------------|---------------------|-------------------|---------|------------------------------------------------------------------------------------------|-------------------------|------------|-----------------------------------|
| 1          | terpene                | 913,294             | 930,557           | 17,263  | carotenoid                                                                               | 100%                    | BGC0000648 | <i>Myxococcus xanthus</i>         |
| 2          | NRPS, T1PKS            | 1,032,294           | 1,080,211         | 47,917  | -                                                                                        | -                       | -          | -                                 |
| 3          | NRPS-like              | 1,827,140           | 1,868,365         | 41,225  | VEPE / AEPE / TG-1                                                                       | 100%                    | BGC0000871 | <i>Myxococcus xanthus</i> DK 1622 |
| 4          | terpene                | 2,119,082           | 2,141,484         | 22,402  | -                                                                                        | -                       | -          | -                                 |
| 5          | T1PKS, NRPS            | 2,428,410           | 2,482,711         | 54,301  | chloromyxamide                                                                           | 13%                     | BGC0001945 | <i>Myxococcus</i> sp.             |
| 6          | T1PKS                  | 2,606,636           | 2,651,986         | 45,350  | chloromyxamide                                                                           | 27%                     | BGC0001945 | <i>Myxococcus</i> sp.             |
| 7          | NRPS                   | 2,816,735           | 2,882,770         | 66,035  | -                                                                                        | -                       | -          | -                                 |
| 8          | RiPP-like              | 3,013,876           | 3,022,723         | 8,847   | -                                                                                        | -                       | -          | -                                 |
| 9          | T1PKS, NRPS-like, NRPS | 3,103,725           | 3,257,110         | 153,385 | -                                                                                        | -                       | -          | -                                 |
| 10         | NRPS, T1PKS            | 3,442,275           | 3,494,934         | 52,659  | BE-43547A1 / BE-43547A2 / BE-43547B1 / BE-43547B2 / BE-43547B3 / BE-43547C1 / BE-43547C2 | 10%                     | BGC0001330 | <i>Micromonospora</i> sp. RV43    |
| 11         | lanthipeptide-class-i  | 4,030,200           | 4,051,486         | 21,286  | -                                                                                        | -                       | -          | -                                 |
| 12         | NRPS, T1PKS            | 4,186,913           | 4,241,185         | 54,272  | -                                                                                        | -                       | -          | -                                 |
| 13         | T1PKS, NRPS            | 4,412,963           | 4,485,151         | 72,188  | -                                                                                        | -                       | -          | -                                 |
| 14         | lanthipeptide-class-i  | 4,529,903           | 4,551,241         | 21,338  | -                                                                                        | -                       | -          | -                                 |
| 15         | RiPP-like              | 4,746,094           | 4,757,661         | 11,567  | -                                                                                        | -                       | -          | -                                 |
| 16         | NRPS                   | 4,857,415           | 4,924,895         | 67,480  | -                                                                                        | -                       | -          | -                                 |
| 17         | lanthipeptide-class-ii | 5,052,309           | 5,073,083         | 20,774  | -                                                                                        | -                       | -          | -                                 |
| 18         | NRPS, T1PKS            | 5,209,355           | 5,345,413         | 136,058 | myxoprincomide-c506                                                                      | 66%                     | BGC0000393 | <i>Myxococcus xanthus</i> DK 1622 |

|    |                                |           |           |        |                                                              |      |             |                                                |
|----|--------------------------------|-----------|-----------|--------|--------------------------------------------------------------|------|-------------|------------------------------------------------|
| 19 | RRE-containing                 | 5,384,977 | 5,403,935 | 18,958 | -                                                            | -    | -           | -                                              |
| 20 | NRPS, T1PKS                    | 5,481,949 | 5,577,500 | 95,551 | myxochelin A /<br>myxochelin B                               | 83%  | BGC00001345 | <i>Stigmatella<br/>aurantiaca</i> Sg a15       |
| 21 | NRPS                           | 5,625,043 | 5,674,634 | 49,591 | -                                                            | -    | -           | -                                              |
| 22 | RiPP-like                      | 5,680,374 | 5,690,671 | 10,297 | -                                                            | -    | -           | -                                              |
| 23 | LAP,thiopeptide, RiPP-<br>like | 5,825,525 | 5,852,242 | 26,717 | ficellomycin                                                 | 5%   | BGC0001593  | <i>Streptomyces ficellus</i>                   |
| 24 | T1PKS                          | 6,407,278 | 6,448,051 | 40,773 | minutissamide A /<br>minutissamide<br>C /<br>minutissamide D | 30%  | BGC0001952  | <i>Anabaena<br/>minutissima</i> UTEX<br>B 1613 |
| 25 | lanthipeptide-class-i          | 6,566,995 | 6,592,859 | 25,864 | -                                                            | -    | -           | -                                              |
| 26 | terpene                        | 6,928,334 | 6,945,580 | 17,246 | -                                                            | -    | -           | -                                              |
| 27 | thiopeptide, thioamitides      | 7,099,821 | 7,138,262 | 38,441 | -                                                            | -    | -           | -                                              |
| 28 | NRPS, T1PKS                    | 7,184,802 | 7,246,797 | 61,995 | nostopeptolide<br>A2                                         | 50%  | BGC0001028  | <i>Nostoc</i> sp. GSV224                       |
| 29 | NRPS, arylpolyene              | 7,341,187 | 7,422,939 | 81,752 | APE Ec                                                       | 36%  | BGC0000836  | <i>Escherichia coli</i><br>CFT073              |
| 30 | lanthipeptide-class-ii         | 7,528,620 | 7,551,841 | 23,221 | -                                                            | -    | -           | -                                              |
| 31 | butyrolactone                  | 8,181,142 | 8,191,966 | 10,824 | -                                                            | -    | -           | -                                              |
| 32 | NRPS-like                      | 8,321,728 | 8,364,736 | 43,008 | myxochromide D                                               | 10%  | BGC0002671  | <i>Verrucosispora</i> sp.                      |
| 33 | phenazine                      | 8,386,250 | 8,406,681 | 20,431 | streptobactin                                                | 0.11 | BGC0000368  | <i>Streptomyces</i> sp.<br>ATCC 700974         |
| 34 | T3PKS                          | 9,028,261 | 9,069,358 | 41,097 | alkylpyrone-407 /<br>alkylpyrone-393                         | 0.34 | BGC0001964  | <i>Cystobacterineae</i><br>bacterium           |
| 35 | terpene                        | 9,239,314 | 9,261,572 | 22,258 | geosmin                                                      | 1    | BGC0000661  | <i>Nostoc<br/>punctiforme</i> PCC<br>73102     |
| 36 | RiPP-like, RRE-containing      | 9,512,033 | 9,533,635 | 21,602 | -                                                            | -    | -           | -                                              |

**Table S2.** List of chemicals, chemical formulae, and supplier. Chemicals were used in the purest form available.

| Chemical                         | Chemical formula                                                     | Supplier          | Chemical                             | Chemical formula                                                    | Supplier         |
|----------------------------------|----------------------------------------------------------------------|-------------------|--------------------------------------|---------------------------------------------------------------------|------------------|
| BactoPeptone                     | -                                                                    | Beckto Dickinson  | magnesium sulfate heptahydrate       | MgSO <sub>4</sub> x 7 H <sub>2</sub> O                              | Carl Roth        |
| meat extract                     | -                                                                    | Fluka             | dipotassium-phosphate                | K <sub>2</sub> HPO <sub>4</sub>                                     | Carl Roth        |
| raffinose D(+) pentahydrate      | C <sub>18</sub> H <sub>32</sub> O <sub>16</sub> x 5 H <sub>2</sub> O | Sigma Aldrich     | calcium chloride dihydrate           | CaCl <sub>2</sub> x 2 H <sub>2</sub> O                              | Carl Roth        |
| sucrose D(+)                     | C <sub>12</sub> H <sub>22</sub> O <sub>11</sub>                      | Carl Roth         | vitamin B12                          | C <sub>63</sub> H <sub>88</sub> CoN <sub>14</sub> O <sub>14</sub> P | Carl Roth        |
| galactose D(+)                   | C <sub>6</sub> H <sub>12</sub> O <sub>6</sub>                        | Carl Roth         | EDTA                                 | C <sub>10</sub> H <sub>16</sub> N <sub>2</sub> O <sub>8</sub>       | Carl Roth        |
| soluble starch                   | (C <sub>6</sub> H <sub>10</sub> O <sub>5</sub> ) <sub>n</sub>        | Carl Roth         | iron (II) sulfate heptahydrate       | FeSO <sub>4</sub> x 7 H <sub>2</sub> O                              | Carl Roth        |
| BactoCasitone                    | -                                                                    | Beckto Dickinson  | zinc sulfate heptahydrate            | ZnSO <sub>4</sub> x 7 H <sub>2</sub> O                              | AppliChem        |
| boric Acid                       | H <sub>3</sub> BO <sub>3</sub>                                       | Carl Roth         | manganese (II) chloride tetrahydrate | MnCl <sub>2</sub> x 4 H <sub>2</sub> O                              | Carl Roth        |
| cobalt (II) chloride hexahydrate | CoCl <sub>2</sub> x 6 H <sub>2</sub> O                               | Carl Roth         | copper (II) chloride dihydrate       | CuCl <sub>2</sub> x 2 H <sub>2</sub> O                              | Carl Roth        |
| nickel (II) chloride dihydrate   | NiCl <sub>2</sub> x 6 H <sub>2</sub> O                               | Alfa Aesar        | sodium molybdate dihydrate           | MoNa <sub>2</sub> O <sub>4</sub> x 2 H <sub>2</sub> O               | Carl Roth        |
| sodium chloride                  | NaCl                                                                 | Carl Roth         | D (+) glucose                        | C <sub>6</sub> H <sub>12</sub> O <sub>6</sub>                       | Carl Roth        |
| malt extract                     | -                                                                    | Carl Roth         | Bacto yeast extract                  | -                                                                   | Beckto Dickinson |
| potassium dihydrogen phosphate   | KH <sub>2</sub> PO <sub>4</sub>                                      | Carl Roth         | sodium nitrate                       | NaNO <sub>3</sub>                                                   | Carl Roth        |
| manganese (II) sulfate hydrate   | MnSO <sub>4</sub> x H <sub>2</sub> O                                 | Carl Roth         | thiamine-HCl                         | C <sub>12</sub> H <sub>17</sub> ClN <sub>4</sub> OS x HCl           | Carl Roth        |
| ethyl acetate                    | C <sub>4</sub> H <sub>8</sub> O <sub>2</sub>                         | VWR               | L-proline                            | C <sub>5</sub> H <sub>9</sub> NO <sub>2</sub>                       | Carl Roth        |
| ethanol                          | C <sub>2</sub> H <sub>6</sub> O                                      | Carl Roth         | disodium hydrogen phosphate          | Na <sub>2</sub> HPO <sub>4</sub> x 2 H <sub>2</sub> O               | AppliChem        |
| toluene                          | C <sub>7</sub> H <sub>8</sub>                                        | Fisher Scientific | ammonium chloride                    | NH <sub>4</sub> Cl                                                  | Carl Roth        |
| methanol                         | CH <sub>4</sub> O                                                    | Carl Roth         |                                      |                                                                     |                  |

**Table S3.** Steps and settings used for raw data processing in MZmine 2.35.

| Input                     | Step                                      | Settings                                                                                              | Output                               |
|---------------------------|-------------------------------------------|-------------------------------------------------------------------------------------------------------|--------------------------------------|
| raw data,<br>mzXML-format | Peak Detection -> Mass<br>Detection       | MS level: 1<br>Mass Detector:<br>Centroid<br>Noise level: 1.0E3                                       | mass list                            |
| raw data,<br>mzXML-format | Peak Detection -> Mass<br>Detection       | MS level: 2<br>Mass Detector:<br>Centroid<br>Noise level: 1.0E1                                       | mass list                            |
| mass list                 | Peak Detection -><br>Chromatogram Builder | MS level: 1<br>Min time span: 0.01<br>min<br>Min height: 1.0E3<br>m/z tolerance: 0.01 m/z<br>or 0 ppm | peak lists, suffix:<br>chromatograms |

**Table S4.** Steps and settings used for peak list processing in MZmine 2.35.

| Input                                                              | Step                                               | Settings                                                                                                                                                                                                                         | Output                                                          |
|--------------------------------------------------------------------|----------------------------------------------------|----------------------------------------------------------------------------------------------------------------------------------------------------------------------------------------------------------------------------------|-----------------------------------------------------------------|
| peak lists, suffix:<br>chromatograms                               | Peak Detection -><br>Chromatogram<br>Deconvolution | Algorithm: Baseline cut-off<br>with Min peak height: 1.5E3,<br>Peak duration range (min):<br>0.01 – 3.00, Baseline level:<br>1.0E3<br>m/z range for MS2 scan<br>paring (Da): 0.01<br>RT range for MS2 scan<br>pairing (min): 0.1 | peak lists, suffix:<br>chromatograms<br>deconvoluted            |
| peak lists, suffix:<br>chromatograms<br>deconvoluted               | Isotopes -><br>Isotopic peaks<br>grouper           | m/z tolerance: 0.01 m/z or 0<br>ppm<br>RT tolerance: 0.1 min<br>Maximum charge: 3<br>Representative isotope: Most<br>intense                                                                                                     | peak lists, suffix:<br>chromatograms<br>deconvoluted deisotoped |
| peak lists, suffix:<br>chromatograms<br>deconvoluted<br>deisotoped | Alignment -> Join<br>Aligner                       | m/z tolerance: 0.01 m/z or 0<br>ppm<br>Weight for m/z: 80<br>RT tolerance: 0.1 min<br>Weight for RT: 20                                                                                                                          | aligned peak list                                               |
| aligned peak list                                                  | Filtering -> Peak<br>list rows filter              | Minimum peaks in a row: 2<br>Keep only peaks with MS2<br>scan                                                                                                                                                                    | aligned peak list, suffix:<br>filtered                          |
| aligned peak list,<br>suffix:<br>gap-filled                        | Gap-filling -><br>Peak finder                      | Intensity tolerance: 10%<br>m/z tolerance: 0.01 m/z or 0<br>ppm<br>Retention time tolerance: 0.2<br>absolute (min)                                                                                                               | aligned peak list, suffix:<br>filtered gap-filled               |

**Table S5.** List of control groups and background samples for each univariate experiment with *C. coralloides*. The control group for all univariate experiments was *C. coralloides* grown on SP medium without any additives.

| Univariate Experiments        | Background samples to be subtracted       |
|-------------------------------|-------------------------------------------|
| SP medium + P <sub>Ba</sub>   | SP medium and extracted P <sub>Ba</sub>   |
| SP medium + P <sub>Sg</sub>   | SP medium and extracted P <sub>Sg</sub>   |
| SP medium + Sup <sub>Ba</sub> | SP medium and extracted Sup <sub>Ba</sub> |
| SP medium + Sup <sub>Sg</sub> | SP medium and extracted Sup <sub>Sg</sub> |
| SP medium + 1% v/v Tol        | SP medium with 1% v/v toluene             |
| SP medium + 1% v/v EtOH       | SP medium with 1% v/v ethanol             |
| M9 medium                     | M9 medium                                 |
| MD1 medium                    | MD1 medium                                |

**Table S6.** List of background samples and univariate samples for each bivariate experiment with *C. coralloides* (Cc). The control group for all bivariate experiments was *C. coralloides* grown on SP medium without any additives. A combined background sample was used for the experiments with organic solvents, i.e., the solvent (ethanol (EtOH) or toluene (Tol)) was directly added to the respective medium which was then extracted.

| <b>Bivariate Experiments</b>   | <b>Background samples to be subtracted</b> | <b>Univariate condition 1: additive (to be subtracted)</b> | <b>Univariate condition 2: medium (to be subtracted)</b> |
|--------------------------------|--------------------------------------------|------------------------------------------------------------|----------------------------------------------------------|
| M9 medium + P <sub>Sg</sub>    | M9 medium and extracted P <sub>Sg</sub>    | Cc on SP medium + P <sub>Sg</sub>                          | Cc on M9 medium                                          |
| M9 medium + P <sub>Ba</sub>    | M9 medium and extracted P <sub>Ba</sub>    | Cc on SP medium + P <sub>Ba</sub>                          | Cc on M9 medium                                          |
| MD1 medium + P <sub>Sg</sub>   | MD1 medium and extracted P <sub>Sg</sub>   | Cc on SP medium + P <sub>Sg</sub>                          | Cc on MD1 medium                                         |
| MD1 medium + P <sub>Ba</sub>   | MD1 medium and extracted P <sub>Ba</sub>   | Cc on SP medium + P <sub>Ba</sub>                          | Cc on MD1 medium                                         |
| M9 medium + Sup <sub>Sg</sub>  | M9 medium and extracted Sup <sub>Sg</sub>  | Cc on SP medium + Sup <sub>Sg</sub>                        | Cc on M9 medium                                          |
| M9 medium + Sup <sub>Ba</sub>  | M9 medium and extracted Sup <sub>Ba</sub>  | Cc on SP medium + Sup <sub>Ba</sub>                        | Cc on M9 medium                                          |
| MD1 medium + Sup <sub>Sg</sub> | MD1 medium and extracted Sup <sub>Sg</sub> | Cc on SP medium + Sup <sub>Sg</sub>                        | Cc on MD1 medium                                         |
| MD1 medium + Sup <sub>Ba</sub> | MD1 medium and extracted Sup <sub>Ba</sub> | Cc on SP medium + Sup <sub>Ba</sub>                        | Cc on MD1 medium                                         |
| M9 medium + 1% v/v Tol         | M9 medium with 1% v/v Tol                  | Cc on SP medium + 1% v/v Tol                               | Cc on M9 medium                                          |
| M9 medium + 1% v/v EtOH        | M9 medium with 1% v/v EtOH                 | Cc on SP medium + 1% v/v EtOH                              | Cc on M9 medium                                          |
| MD1 medium + 1% v/v Tol        | MD1 medium with 1% v/v Tol                 | Cc on SP medium + 1% v/v Tol                               | Cc on MD1 medium                                         |
| MD1 medium + 1% v/v EtOH       | MD1 medium with 1% v/v EtOH                | Cc on SP medium + 1% v/v EtOH                              | Cc on MD1 medium                                         |

**Table S7.** New mass features from bivariate OSMAC experiments and culture condition sets under which they were produced. P<sub>Ba</sub> = B. amyloliquefaciens pellet, Sup<sub>Ba</sub> = B. amyloliquefaciens supernatant, P<sub>Sg</sub> = S. griseochromogenes pellet, Sup<sub>Sg</sub> = S. griseochromogenes supernatant, EtOH = Ethanol, Tol = toluene. All m/z represent [M+H]<sup>+</sup> unless specified otherwise. n/a = not applicable

| Mass feature [tr _m/z]                             | tr [min] | m/z [-]  | Producing conditions           | Neutral sum formula |
|----------------------------------------------------|----------|----------|--------------------------------|---------------------|
| 2.3_298.0922 [M+H] <sup>2+</sup>                   | 2.3      | 298.0922 | M9 + SupSg                     | C22H22N14O5S        |
| 2.3_282.1064                                       | 2.3      | 282.1064 | M9 + SupSg                     | n/a                 |
| 2.38_595.1692                                      | 2.38     | 595.1692 | M9 + SupSg                     | C22H22N14O5S        |
| 2.47_314.0763 [M+H] <sup>2+</sup>                  | 2.47     | 314.0763 | M9 + SupSg                     | C22H22N14O5S2       |
| 2.48_627.1379                                      | 2.48     | 627.1379 | M9 + SupSg                     | C22H22N14O5S2       |
| 2.48_282.1076                                      | 2.48     | 282.1076 | M9 + SupSg                     | n/a                 |
| 2.49_213.1                                         | 2.49     | 213.1    | MD1 + EtOH 1 % v/v             | C8H12N4O3           |
| 2.59_415.1306                                      | 2.59     | 415.1306 | M9 + SupSg                     | C13H18N8O8          |
| 2.66_297.0738 [M+H-H <sub>2</sub> O] <sup>+</sup>  | 2.66     | 297.0738 | M9 + SupSg                     | n/a                 |
| 3.82_395.1069                                      | 3.82     | 395.1069 | M9 + SupSg, M9 + SupBa         | C15H18N6O5S         |
| 4.59_293.093                                       | 4.59     | 293.093  | MD1 + EtOH 1 % v/v             | C11H18NO6S          |
| 5.11_240.0653                                      | 5.11     | 240.0653 | MD1 + EtOH 1 % v/v             | C6H13N3O5S          |
| 5.11_192.0625                                      | 5.11     | 192.0625 | MD1 + EtOH 1 % v/v             | C7H11O6             |
| 7.48_385.2918                                      | 7.48     | 385.2918 | M9 + SupBa                     | C22H40O5            |
| 7.54_341.2658                                      | 7.54     | 341.2658 | M9 + SupBa                     | C20H36O4            |
| 7.99_443.3359                                      | 7.99     | 443.3359 | M9 + SupBa                     | C25H46O6            |
| 8.12_399.3067                                      | 8.12     | 399.3067 | M9 + SupBa                     | C23H42O5            |
| 8.38_326.3675                                      | 8.38     | 326.3675 | M9 + SupSg, MD1 + EtOH 1 % v/v | C21H45N2            |
| 8.96_427.3841                                      | 8.96     | 427.3841 | MD1 + EtOH 1 % v/v             | C16H46N10O3         |
| 10.19_421.337                                      | 10.19    | 421.337  | M9 + SupSg                     | C19H44N6O2S         |
| 10.24_377.3127                                     | 10.24    | 377.3127 | M9 + SupSg                     | C18H40N4O4          |
| 10.48_489.3049                                     | 10.48    | 489.3049 | M9 + SupSg                     | n/a                 |
| 10.5_589.4044                                      | 10.5     | 589.4044 | M9 + SupSg                     | C23H56N8O9          |
| 10.55_545.3787                                     | 10.55    | 545.3787 | M9 + SupSg                     | C37H52O3            |
| 10.55_268.2612                                     | 10.55    | 268.2612 | M9 + SupSg                     | C10H31N6O2          |
| 10.55_268.2548                                     | 10.55    | 268.2548 | M9 + SupSg                     | C10H31N6O2          |
| 10.6_501.3551                                      | 10.6     | 501.3551 | M9 + SupSg                     | C31H48O5            |
| 10.94_603.4183                                     | 10.94    | 603.4183 | M9 + SupSg                     | C23H50N14O5         |
| 11.04_559.3937                                     | 11.04    | 559.3937 | M9 + SupSg, M9 + SupBa         | C15H46N18O5         |
| 11.08_493.3903                                     | 11.08    | 493.3903 | M9 + SupSg                     | C20H48N10O4         |
| 11.1_515.3706                                      | 11.1     | 515.3706 | M9 + SupSg, M9 + SupBa         | C17H46N12O6         |
| 11.17_471.3465                                     | 11.17    | 471.3465 | M9 + SupSg                     | C15H42N12O5         |
| 11.18_302.0946 [M+H-H <sub>2</sub> O] <sup>+</sup> | 11.18    | 302.0946 | M9 + SupSg                     | C15H15N3O2S         |
| 11.21_449.3645                                     | 11.21    | 449.3645 | M9 + SupSg                     | C18H44N10O3         |
| 11.25_617.434                                      | 11.25    | 617.434  | M9 + SupSg                     | C28H56N8O7          |

|                |       |          |                           |              |
|----------------|-------|----------|---------------------------|--------------|
| 11.31_405.3414 | 11.31 | 405.3414 | M9 + SupSg, M9 +<br>SupBa | C16H40N10O2  |
| 11.31_326.2932 | 11.31 | 326.2932 | M9 + SupSg                | C15H37N5O    |
| 11.4_573.4102  | 11.4  | 573.4102 | M9 + SupSg                | C31H52N6O4   |
| 11.66_485.3625 | 11.66 | 485.3625 | M9 + SupSg                | C27H44N6O2   |
| 11.68_463.3811 | 11.68 | 463.3811 | M9 + SupSg                | C24H52N3O3S  |
| 11.78_609.4661 | 11.78 | 609.4661 | M9 + SupSg                | C33H62N5O3S  |
| 11.85_587.4242 | 11.85 | 587.4242 | M9 + SupSg                | C25H60N7O4S2 |
| 11.86_565.4442 | 11.86 | 565.4442 | M9 + SupSg                | C29H62N3O7   |
| 11.87_375.3335 | 11.87 | 375.3335 | M9 + SupSg                | C17H40N7O2   |
| 11.98_521.4198 | 11.98 | 521.4198 | M9 + SupSg                | C13H48N18O4  |
| 12.05_477.3957 | 12.05 | 477.3957 | M9 + SupSg                | C26H48N6O2   |
| 12.2_433.3717  | 12.2  | 433.3717 | M9 + SupSg                | C22H46N4O3   |
| 12.38_535.4346 | 12.38 | 535.4346 | M9 + SupSg                | C12H48N21O3  |
| 12.66_350.3286 | 12.66 | 350.3286 | M9 + SupSg                | C17H41N4O3   |
| 12.83_354.3685 | 12.83 | 354.3685 | M9 + SupSg                | C23H47NO     |



|   | 1                                                                                                                | 2 | 3                                                                                              | 4                                                                                                                | 5                                                                           | 6 |
|---|------------------------------------------------------------------------------------------------------------------|---|------------------------------------------------------------------------------------------------|------------------------------------------------------------------------------------------------------------------|-----------------------------------------------------------------------------|---|
| A | Control:<br>75 $\mu$ L preculture <i>C. coralloides</i><br>+<br>2925 $\mu$ L SP medium                           |   |                                                                                                | Blank<br>3000 $\mu$ L<br>SP                                                                                      | Minimal medium:<br>75 $\mu$ L preculture Cc<br>+<br>2925 $\mu$ L MD1 medium |   |
| B | Additive 1:<br>75 $\mu$ L preculture Cc +<br>2825 $\mu$ L SP medium +<br>100 $\mu$ L pellet Ba                   |   | Additive 2:<br>75 $\mu$ L preculture Cc +<br>2825 $\mu$ L SP medium +<br>100 $\mu$ L pellet Sg |                                                                                                                  | Complex medium:<br>75 $\mu$ L preculture Cc<br>+<br>2925 $\mu$ L M9 medium  |   |
| C | Complex medium + Additive 1:<br>75 $\mu$ L preculture Cc +<br>2825 $\mu$ L MD1 medium +<br>100 $\mu$ L pellet Ba |   |                                                                                                | Complex medium + Additive 2:<br>75 $\mu$ L preculture Cc +<br>2825 $\mu$ L MD1 medium +<br>100 $\mu$ L pellet Sg |                                                                             |   |
| D | Minimal medium + Additive 1:<br>75 $\mu$ L preculture Cc +<br>2825 $\mu$ L M9 medium +<br>100 $\mu$ L pellet Ba  |   |                                                                                                | Minimal medium + Additive 2:<br>75 $\mu$ L preculture Cc +<br>2825 $\mu$ L M9 medium +<br>100 $\mu$ L pellet Sg  |                                                                             |   |

**Figure S1.** Inoculation plan for SD plates type 1 with added cell pellets. White = control and blank, grey = univariate experiments, black = bivariate experiments.

|   | 1                                                                                                                     | 2 | 3                                                                                                   | 4                                                                                                                     | 5                                                                           | 6 |
|---|-----------------------------------------------------------------------------------------------------------------------|---|-----------------------------------------------------------------------------------------------------|-----------------------------------------------------------------------------------------------------------------------|-----------------------------------------------------------------------------|---|
| A | Control:<br>75 $\mu$ L preculture <i>C. coralloides</i><br>+<br>2925 $\mu$ L SP medium                                |   |                                                                                                     | Blank<br>3000 $\mu$ L<br>SP                                                                                           | Minimal medium:<br>75 $\mu$ L preculture Cc<br>+<br>2925 $\mu$ L MD1 medium |   |
| B | Additive 1:<br>75 $\mu$ L preculture Cc +<br>2625 $\mu$ L SP medium +<br>300 $\mu$ L supernatant Ba                   |   | Additive 2:<br>75 $\mu$ L preculture Cc +<br>2625 $\mu$ L SP medium +<br>300 $\mu$ L supernatant Sg |                                                                                                                       | Complex medium:<br>75 $\mu$ L preculture Cc<br>+<br>2925 $\mu$ L M9 medium  |   |
| C | Complex medium + Additive 1:<br>75 $\mu$ L preculture Cc +<br>2625 $\mu$ L MD1 medium +<br>300 $\mu$ L supernatant Ba |   |                                                                                                     | Complex medium + Additive 2:<br>75 $\mu$ L preculture Cc +<br>2625 $\mu$ L MD1 medium +<br>300 $\mu$ L supernatant Sg |                                                                             |   |
| D | Minimal medium + Additive 1:<br>75 $\mu$ L preculture Cc +<br>2625 $\mu$ L M9 medium +<br>300 $\mu$ L supernatant Ba  |   |                                                                                                     | Minimal medium + Additive 2:<br>75 $\mu$ L preculture Cc +<br>2625 $\mu$ L M9 medium +<br>300 $\mu$ L supernatant Sg  |                                                                             |   |

**Figure S2.** Inoculation plan for SD plates types 2 with added supernatants. White = control and blank, grey = univariate experiments, black = bivariate experiments.

|   | 1                                                                                                             | 2 | 3                                                                                           | 4                                                                                                              | 5                                                                           | 6 |
|---|---------------------------------------------------------------------------------------------------------------|---|---------------------------------------------------------------------------------------------|----------------------------------------------------------------------------------------------------------------|-----------------------------------------------------------------------------|---|
| A | Control:<br>75 $\mu$ L preculture <i>C. coralloides</i><br>+<br>2925 $\mu$ L SP medium                        |   |                                                                                             | Blank<br>3000 $\mu$ L<br>SP                                                                                    | Minimal medium:<br>75 $\mu$ L preculture Cc<br>+<br>2925 $\mu$ L MD1 medium |   |
| B | Additive 1:<br>75 $\mu$ L preculture Cc +<br>2895 $\mu$ L SP medium +<br>30 $\mu$ L ethanol                   |   | Additive 2:<br>75 $\mu$ L preculture Cc +<br>2895 $\mu$ L SP medium +<br>30 $\mu$ L toluene |                                                                                                                | Complex medium:<br>75 $\mu$ L preculture Cc<br>+<br>2925 $\mu$ L M9 medium  |   |
| C | Complex medium + Additive 1:<br>75 $\mu$ L preculture Cc +<br>2895 $\mu$ L MD1 medium +<br>30 $\mu$ L ethanol |   |                                                                                             | Complex medium + Additive 2:<br>75 $\mu$ L preculture Cc +<br>2895 $\mu$ L MD1 medium +<br>100 $\mu$ L toluene |                                                                             |   |
| D | Minimal medium + Additive 1:<br>75 $\mu$ L preculture Cc +<br>2895 $\mu$ L M9 medium +<br>30 $\mu$ L ethanol  |   |                                                                                             | Minimal medium + Additive 2:<br>75 $\mu$ L preculture Cc +<br>2895 $\mu$ L M9 medium +<br>30 $\mu$ L toluene   |                                                                             |   |

**Figure S3.** Inoculation plan for SD plates type 3 with added organic solvents. White = control and blank, grey = univariate experiments, black = bivariate experiments.

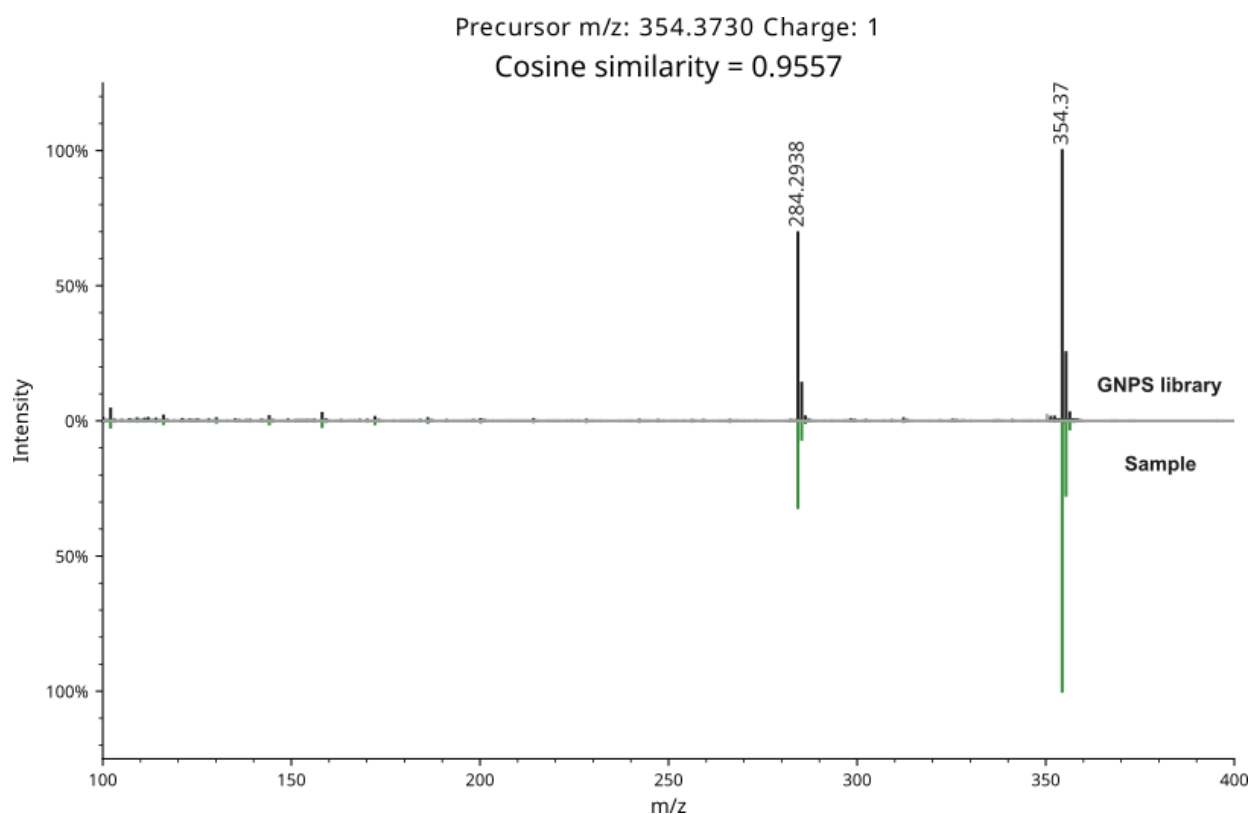

**Figure S4.** GNPS spectral library hit for n-Pentyloctadecanamide. On top the MSMS fragmentation pattern from the spectral library and on the bottom the MSMS acquired in this study.

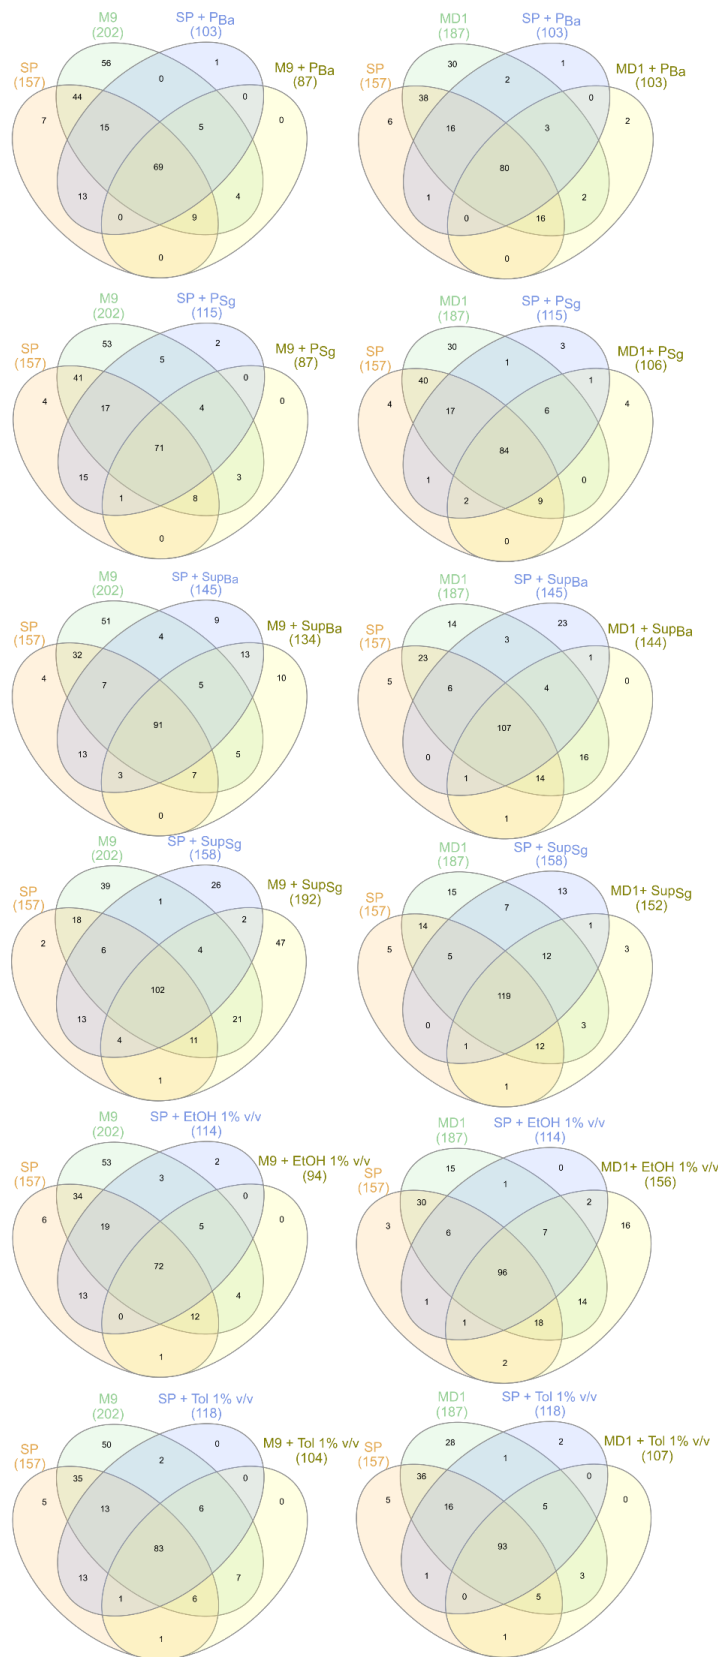

**Figure S5.** Venn diagram of detected MFs in the control (SP, orange), all univariate conditions (minimal medium = green with M9 on the right and MD1 on the left, biotic and chemical additives = blue) and all bivariate conditions (yellow).

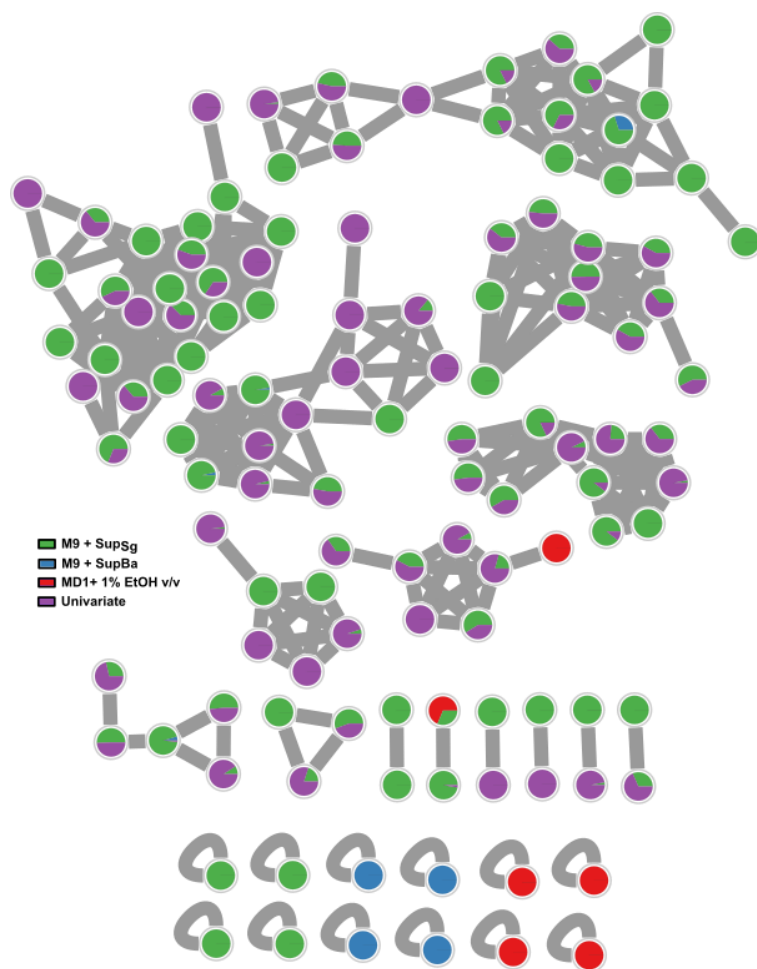

**Figure S6.** Molecular network of all detected unique MFs in bivariate conditions and related MFs in univariate conditions. Each nodes represents a unique MFs including a pie chart with the highest observed abundance in bivariate (M9-medium with Sg supernatant = green, M9-medium with Ba supernatant = blue and MD1-medium with 1 % v/v EtOH = red) and related univariate conditions (purple).

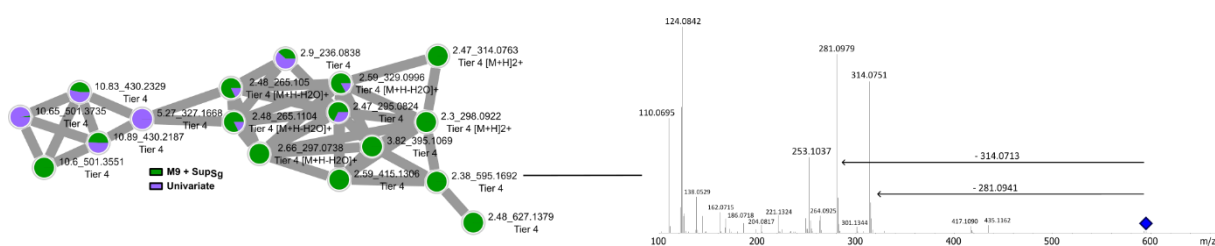

**Figure S7.** On the left a molecular family including labeling of each ion with Name, MFs ( $m/z_{rt}$ ) and annotation level (tier 4 = precursor mass and a unique retention time with no further annotation). All  $m/z$  represent  $[M + H]^+$  unless specified otherwise (shown with labeling). Each nodes represents a unique MFs including a pie chart with the highest observed abundance in bivariate (M9-medium with Sg supernatant = green) and related univariate conditions (purple). On the right a fragmentation spectra of the MF 2.38\_595.1692.
